# Supplementary material for: Polystyrene (PS) Degradation Induced by Nanosecond Electric Discharge in Air in Contact with PS/Water
Source: MDPI journal article supplement (doi:10.3390/plasma7010004), 2024-01-16
Supplement: s1 [file s1]

## Supplementary Material

Polystyrene (PS) degradation by nanosecond electric discharge in air in contact with PS/water

<sup>1</sup>H

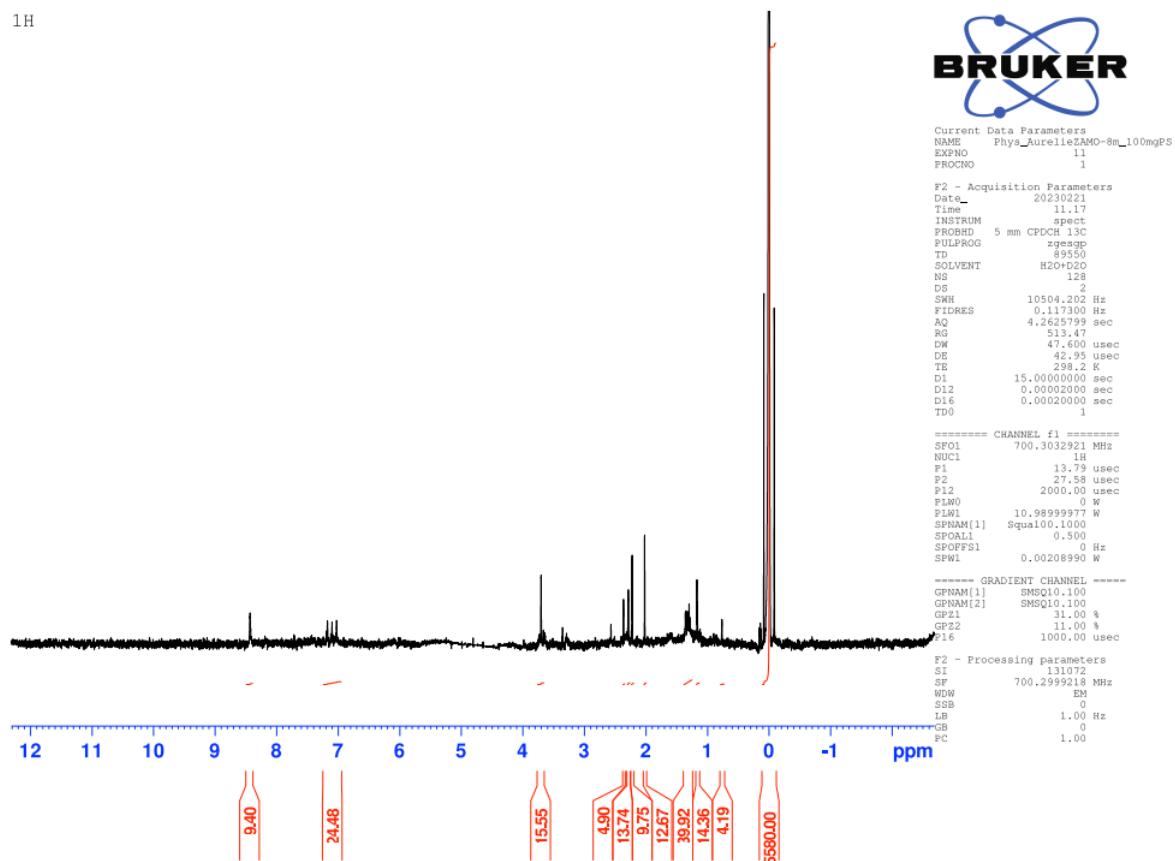

**Figure S1.** NMR spectrum of a discharge processed water that contains PS. The processing was performed under negative polarity voltage ( $V = -12$  kV) at high frequency (10 kHz). The analysis was performed 4 days after processing.

**Table S1.** NMR parameters for sample analysis and spectrum acquisition.

|                    |                                                                                                                              |
|--------------------|------------------------------------------------------------------------------------------------------------------------------|
| Nuclei             | <sup>1</sup> H                                                                                                               |
| Frequency          | 700.303 MHz                                                                                                                  |
| Sequence impulsion | Zgesgp (water suppression using excitation sculpting) T.-L. Hwang & A.J. Shaka, J. Magn. Reson., Series A 112 275-279 (1995) |
| Impulsion 90°      | 13-15 microsecond (optimized for every sample)                                                                               |
| Spectral range     | 15 ppm (center 4.7 ppm)                                                                                                      |
| Points             | 89550                                                                                                                        |
| Accumulation time  | 4.26s                                                                                                                        |
| Relaxation time    | 15 s                                                                                                                         |
| Number of scans    | 128                                                                                                                          |
